# Supplementary material
Source: PubMed Central journal article supplement (PMC2536706)
Supplement: ijbsv04p0309s1.pdf [file ijbsv04p0309s1.pdf]

95.01 % sequence similarity

Upper line: pae49 (Genome database), from 41 to 403

Lower line: pst49 (1<sup>st</sup> BASE), from 19 to 382

pae49 (Genome database); pst49 (1<sup>st</sup> BASE) identity= **95.01 %**(362/381)  
gap=5.69%(23/404)

```
1   CGTGTTCTGCGAAACCATCGGCAACCCGGCGGGCAACATCATCGACCTGCAGGCACTGGC
                                     |||
1   .....CNNNNNCGCCNNNNNNNNNTCGACCTGCAGGCACTGGC

61  CGACGCCGCTCACCGCCACGGCGTGCCACTGATCGTCGACAACACGGTAGCCACCCCGGT
    |||
39  CGACGCCGCTCACCGCCACGGCGTGCCACTGATCGTCGACAACACGGTAGCCACCCCGGT

121 GCTCTGCCGGCCGTTTCGAGCACGGCGCCGACATCGTCGTGCACTCGCTGACCAAGTACAT
    |||
99  GCTCTGCCGGCCGTTTCGAGCACGGCGCCGACATCGTCGTGCACTCGCTGACCAAGTACAT

181 GGGCGGCCACGGCACCAGCATCGGCGGGATCGTGGTTCGACTCCGGCAAATTCGACTGGGC
    |||
159 GGGCGGCCACGGCACCAGCATCGGCGGGATCGTGGTTCGACTCCGGCAAATTCGACTGGGC

241 GGCGAACAAGTCGCGCTTCCCGCTGCTGAACACGCCCAGATCCGTCCTACCACGGCGTCAC
    |||
219 GGCGAACAAGTCGCGCTTCCCGCTGCTGAACACGCCCAGATCCGTCCTACCACGGCGTCAC

301 CTACACCGAGGCCTTCGGACCCGCCGCTTCATCGGCCGCTGCCGGGTGGTACCGCTGCG
    |||
279 CTACACCGAGGCCTTCGGACCCGCCGCTTCATCGGCCGCTGCCGGGTGGTACCGCTGCG

361 CAACATGGGCGCGGCGCTCTCGCCGTTCAACG.CCTTCCTCATC
    |||
339 CAACATGGGCGCGGCGCTCTCGCCGTTCAACGCCCTTCCTCATCA
```

## 96.34 % sequence similarity

Upper line: pae49 (1<sup>st</sup> BASE), from 19 to 382

Lower line: pst49 (1<sup>st</sup> BASE), from 19 to 382

pae49 (1<sup>st</sup> BASE): pst49 (1<sup>st</sup> BASE) identity= **96.34 %** ( 369/383) gap=0.00  
%( 0/383)

```
1   CGGNNGGCCNNCATCATCATCGACCTGCAGGCACTGGCCGACGCCGCTCACCGCCACGGC
   |  ||  |  |  ||||||||||||||||||||||||||||||||||||||||||||
1   CNNNNNCGCCNNNNNNNNNTCGACCTGCAGGCACTGGCCGACGCCGCTCACCGCCACGGC

61  GTGCCACTGATCGTCGACAACACGGTAGCCACCCCGGTGCTCTGCCGGCCGTTTCGAGCAC
   ||||||||||||||||||||||||||||||||||||||||||||||||||||||
61  GTGCCACTGATCGTCGACAACACGGTAGCCACCCCGGTGCTCTGCCGGCCGTTTCGAGCAC

121 GGCGCCGACATCGTCGTGCACTCGCTGACCAAGTACATGGGCGGCCACGGCACCAGCATC
   ||||||||||||||||||||||||||||||||||||||||||||||||||||||
121 GGCGCCGACATCGTCGTGCACTCGCTGACCAAGTACATGGGCGGCCACGGCACCAGCATC

181 GGCGGGATCGTGGTCGACTCCGGCAAATTCGACTGGGCGGCGAACAAGTCGCGCTTCCCG
   ||||||||||||||||||||||||||||||||||||||||||||||||||||||
181 GGCGGGATCGTGGTCGACTCCGGCAAATTCGACTGGGCGGCGAACAAGTCGCGCTTCCCG

241 CTGCTGAACACGCCCGATCCGTCCTACCACGGCGTCACCTACACCGAGGCCTTCGGACCC
   ||||||||||||||||||||||||||||||||||||||||||||||||||||||
241 CTGCTGAACACGCCCGATCCGTCCTACCACGGCGTCACCTACACCGAGGCCTTCGGACCC

301 GCCGCCTTCATCGGCCGCTGCCGGGTGGTACCGCTGCGCAACATGGGCGCGGCGCTCTCG
   ||||||||||||||||||||||||||||||||||||||||||||||||||||||
301 GCCGCCTTCATCGGCCGCTGCCGGGTGGTACCGCTGCGCAACATGGGCGCGGCGCTCTCG

361 CCGTTCAACGCCCTTCCTCATCA
   ||||||||||||||||||
361 CCGTTCAACGCCCTTCCTCATCA
```
